# Supplementary material for: Zinc(ii) phthalocyanine–viologen dyads: synthesis, electrochemistry, spectroelectrochemistry, electrodeposition, and electrochromism
Source: Royal Society of Chemistry journal article supplement (doi:10.1039/d2nj00889k), 2022-01-01
Supplement: d2nj00889k1.pdf [file d2nj00889k1.pdf]

## New Journal of Chemistry

### Electronic Supplementary Information

#### Zinc(II) Phthalocyanine-Viologen Dyads: Synthesis, Electrochemistry, Spectroelectrochemistry, Electrodeposition, and Electrochromism

Burak Yıldız<sup>a,b</sup>, Erem Ahmetali<sup>a</sup>, Özlem Budak<sup>c</sup>, Atıf Koca<sup>c,\*</sup>, M. Kasım Şener<sup>a,\*</sup>

<sup>a</sup> *Department of Chemistry, Faculty of Arts and Sciences, Yıldız Technical University, Esenler,  
34210 İstanbul, Turkey*

<sup>b</sup> *Program of Refinery and Petrochemical Technology, Aliğa Vocational Training School, Ege  
University, Aliğa, 35800 İzmir, Turkey*

<sup>c</sup> *Department of Chemical Engineering, Faculty of Engineering, Marmara University, Kadıköy,  
34722 İstanbul, Turkey*

\* Corresponding authors.

*E-mail addresses:* akoca@marmara.edu.tr (A. Koca),

mkasimsener@gmail.com (M. K. Şener)

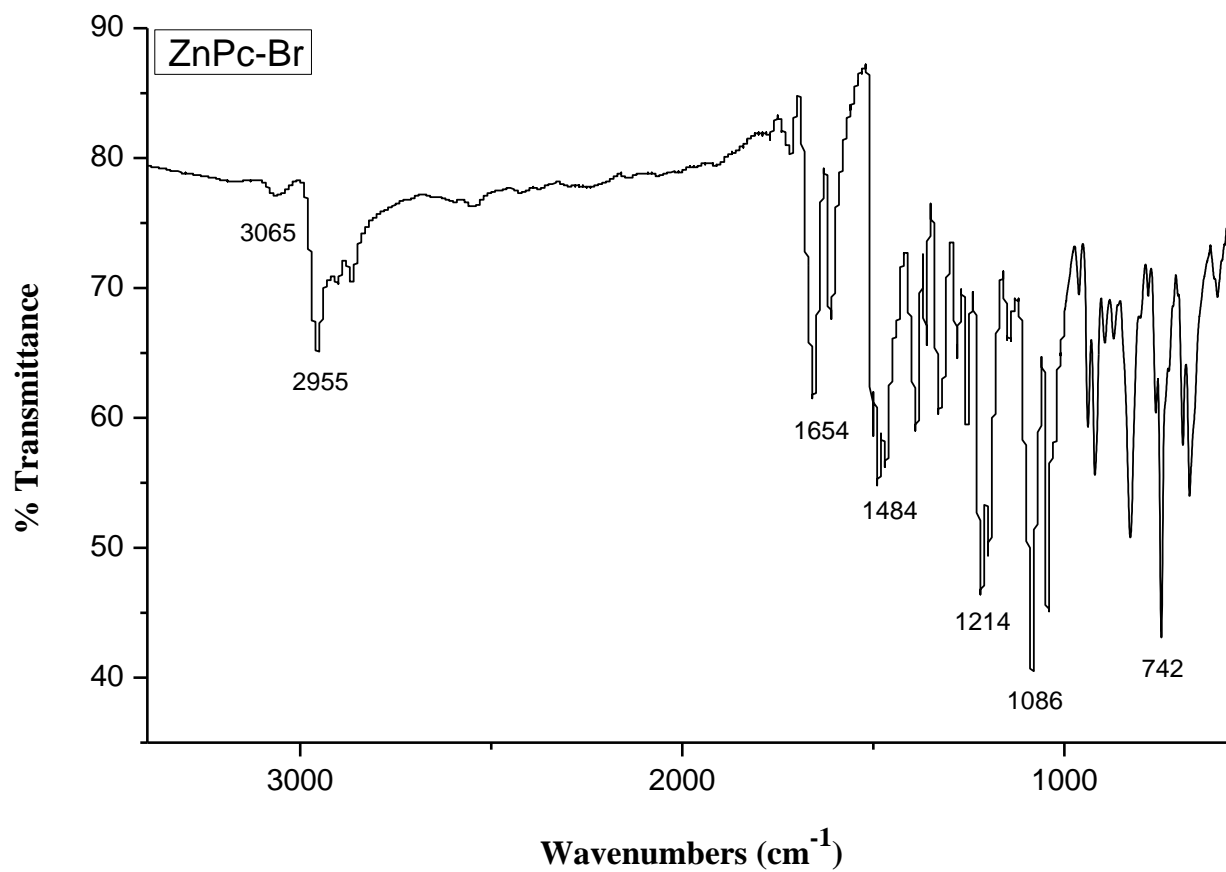

**Fig. S1.** FT-IR spectrum of **ZnPc-Br**.

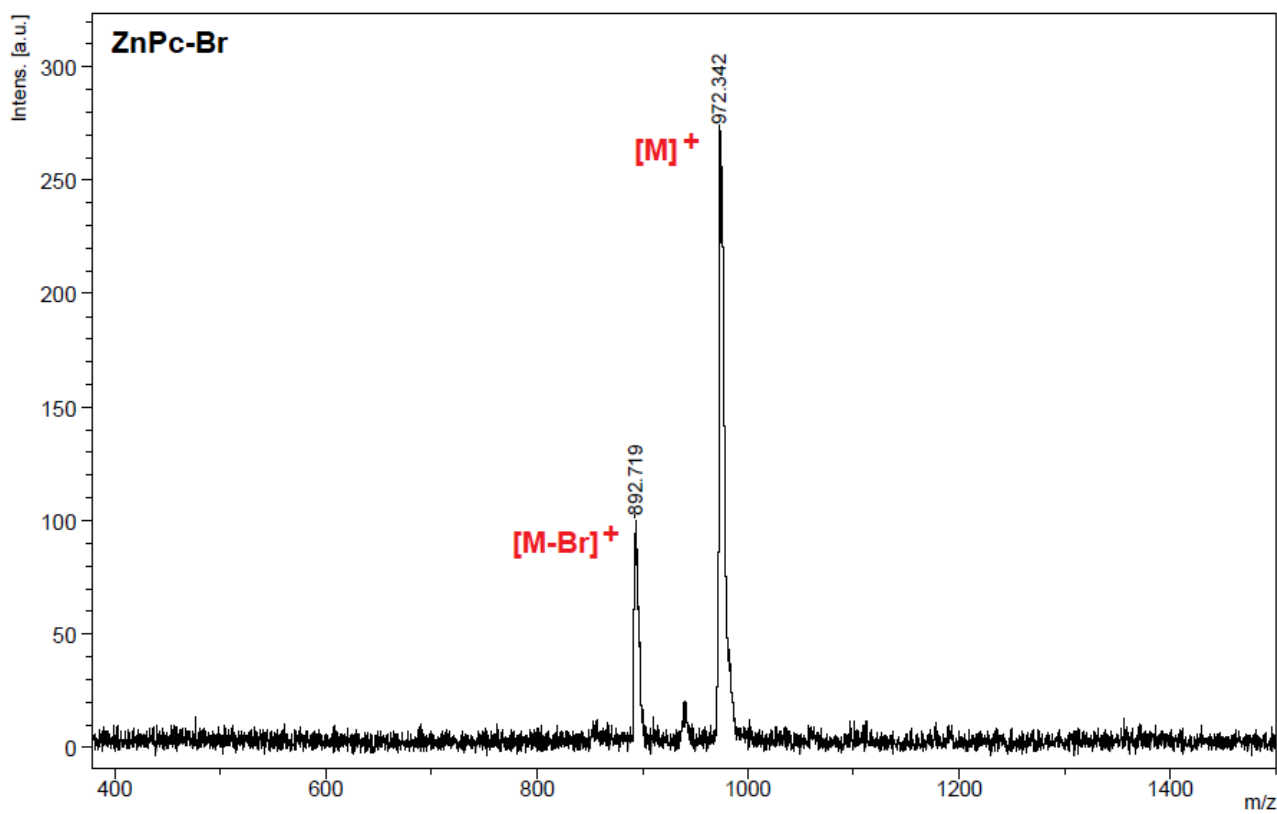

**Fig. S2.** MALDI-TOF MS spectrum of **ZnPc-Br** (matrix: 2,5-Dihydroxybenzoic acid).

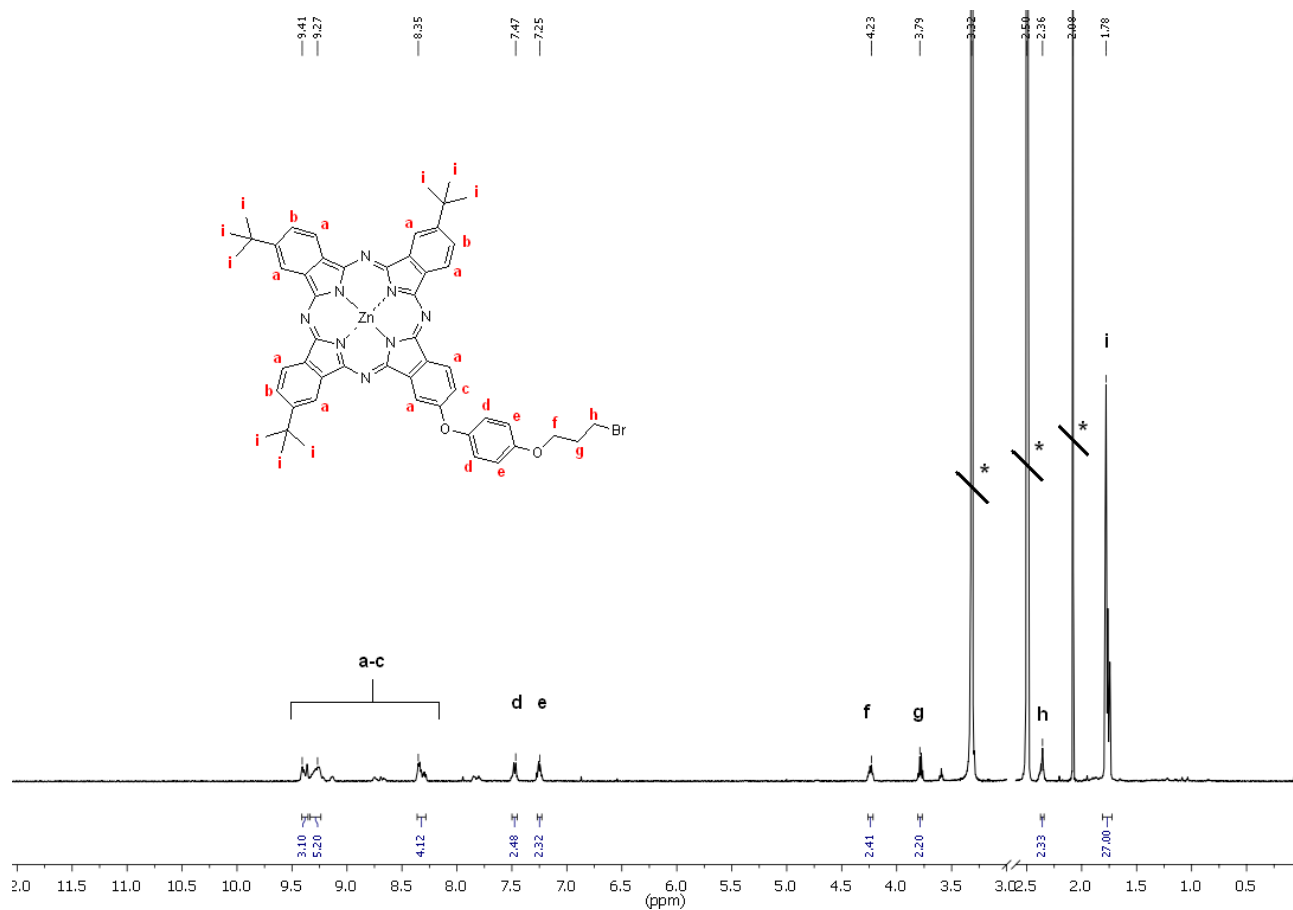

**Fig. S3.** <sup>1</sup>H-NMR spectrum of **ZnPc-Br** in DMSO-*d*<sub>6</sub> (\* indicates residual solvent peaks).

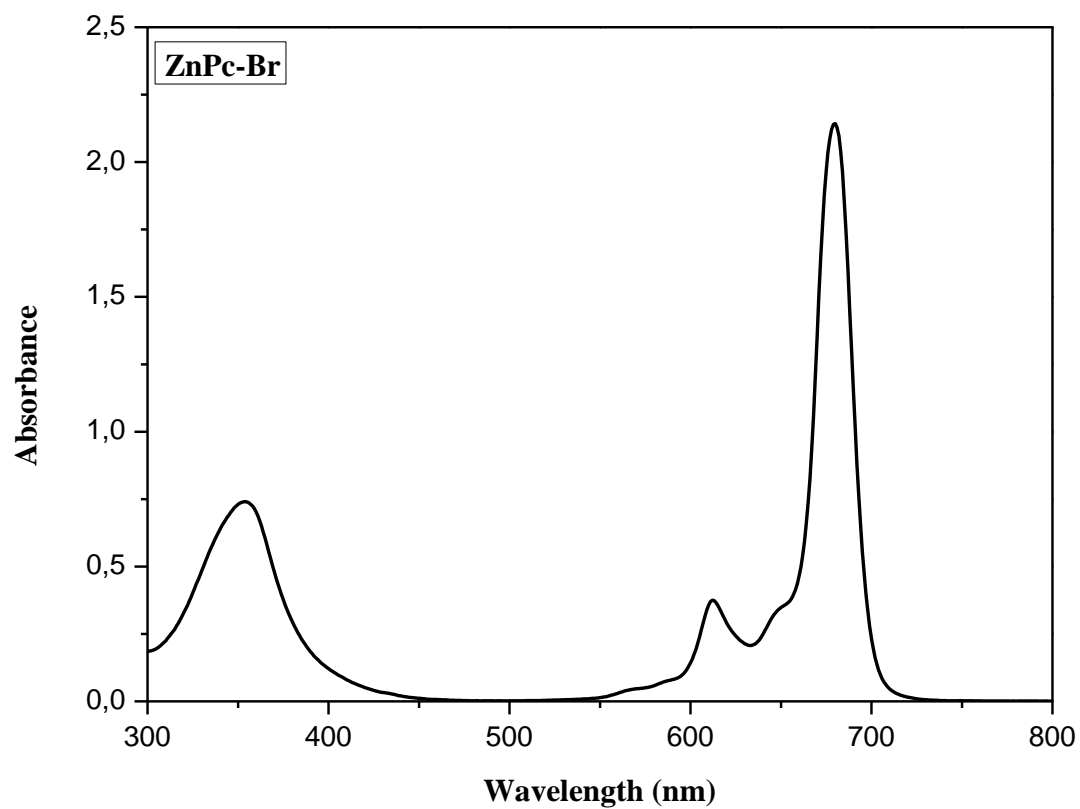

**Fig. S4.** UV-vis spectrum of **ZnPc-Br** in DMSO (concentration:  $10^{-5}$  M).

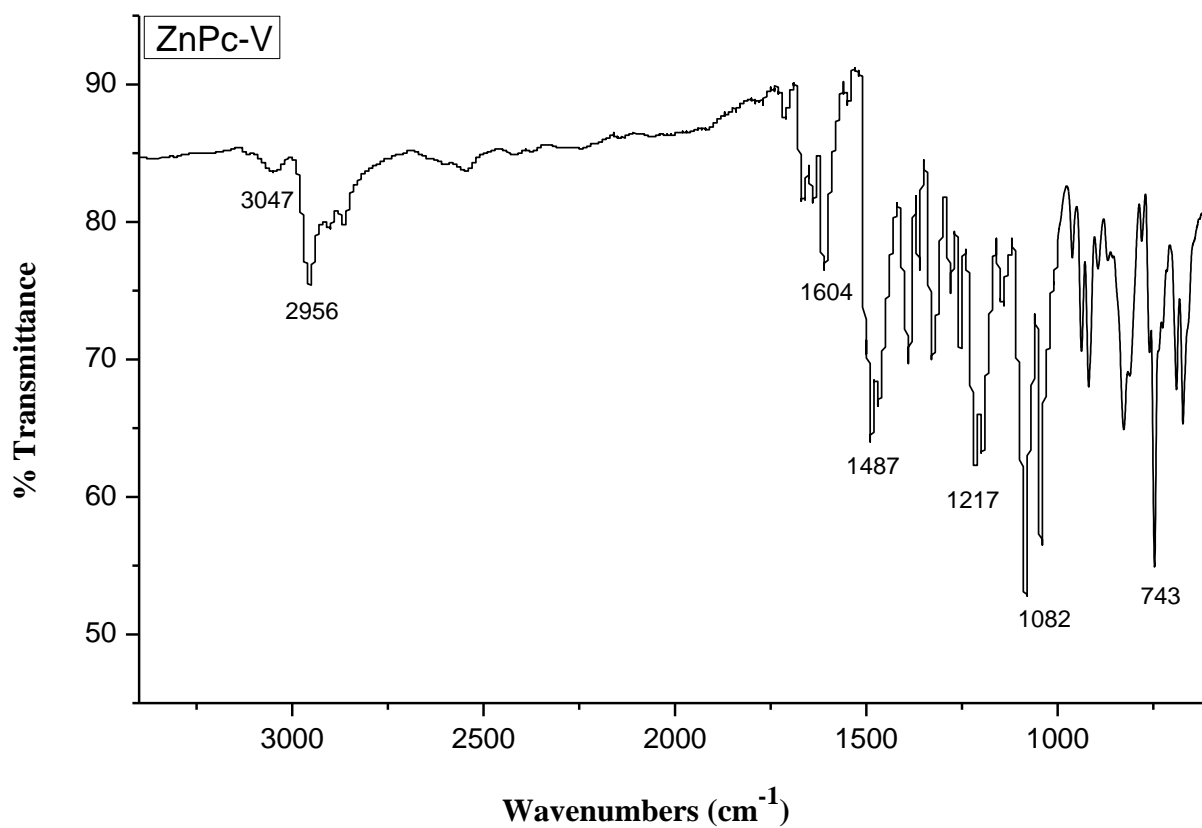

Fig. S5. FT-IR spectrum of ZnPc-V.

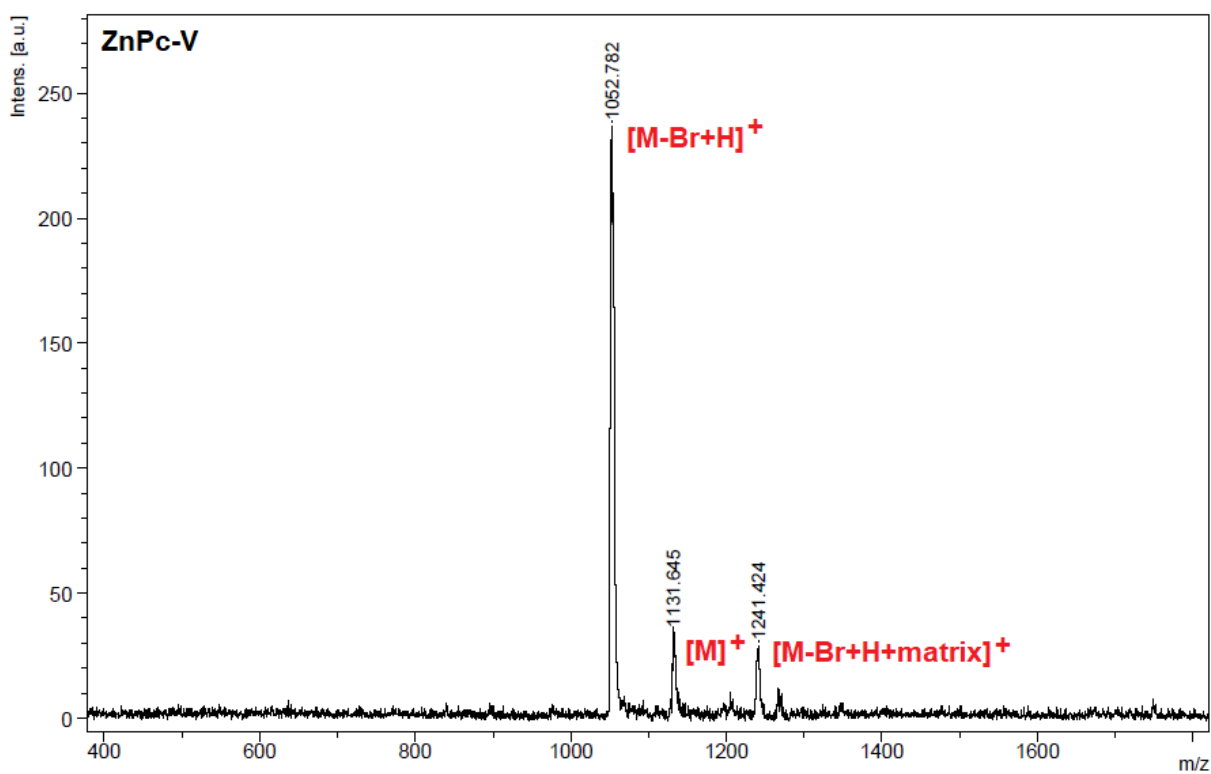

Fig. S6. MALDI-TOF MS spectrum of ZnPc-V (matrix:  $\alpha$ -cyano-4-hydroxy-cinnamic acid).

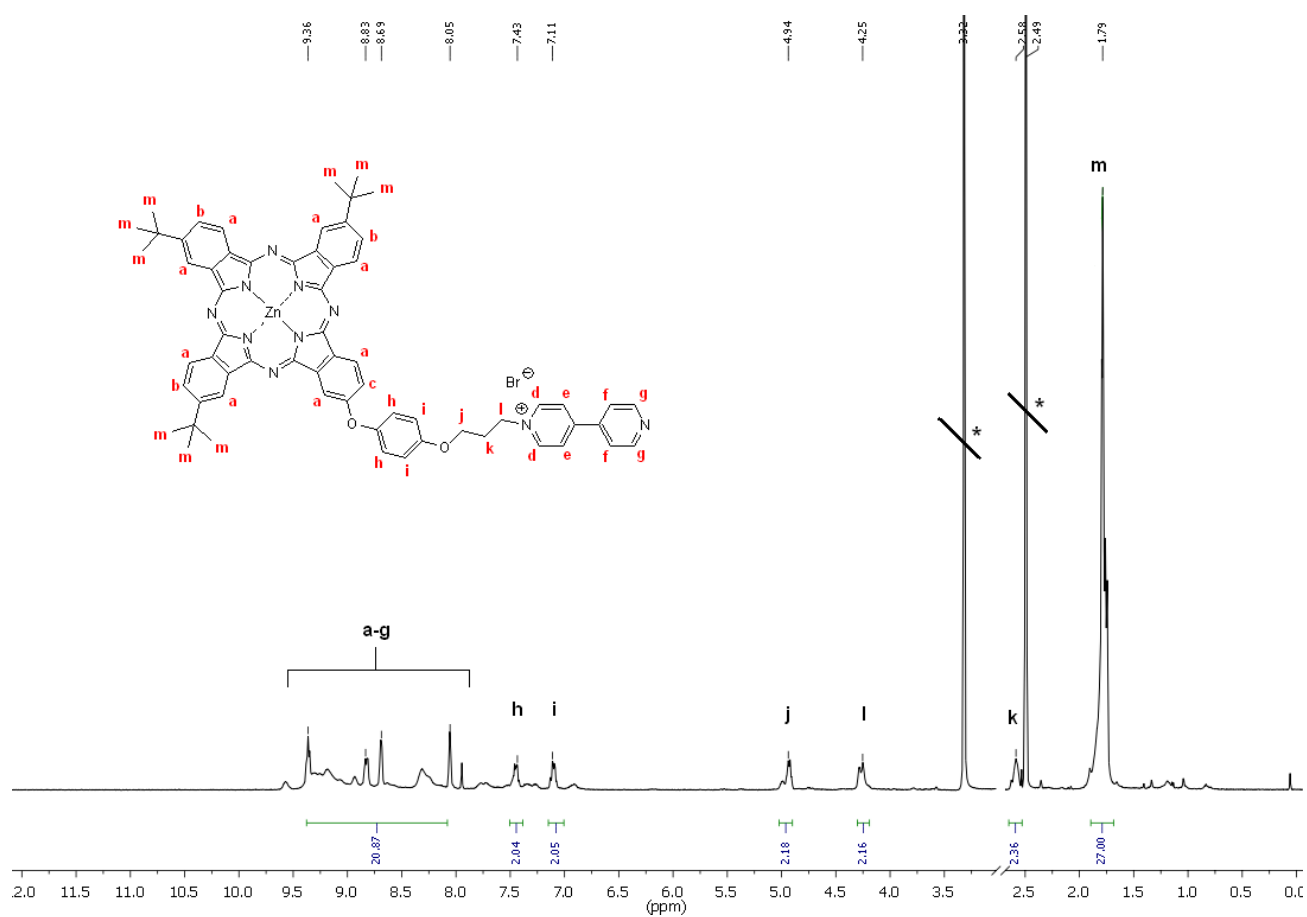

**Fig. S7.** <sup>1</sup>H-NMR spectrum of **ZnPc-V** in DMSO-*d*<sub>6</sub> (\* indicates residual solvent peaks).

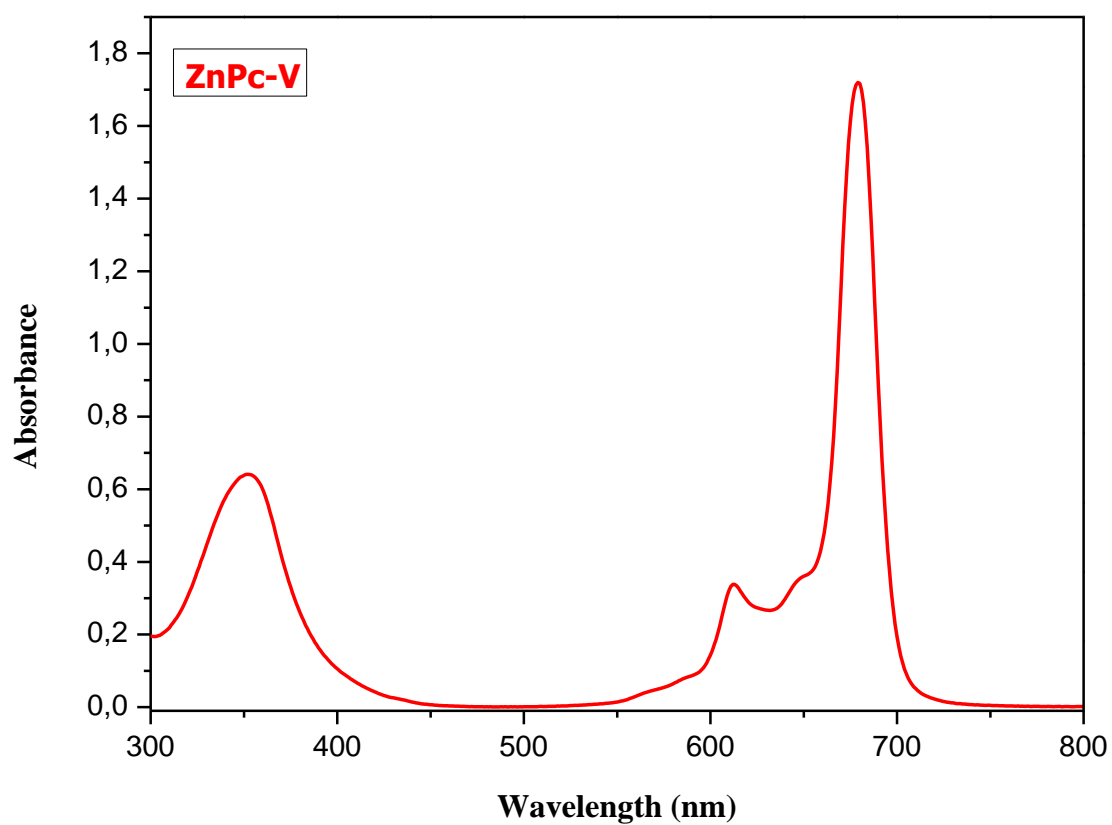

**Fig. S8.** UV-vis spectrum of **ZnPc-V** in DMSO (concentration:  $10^{-5}$  M).

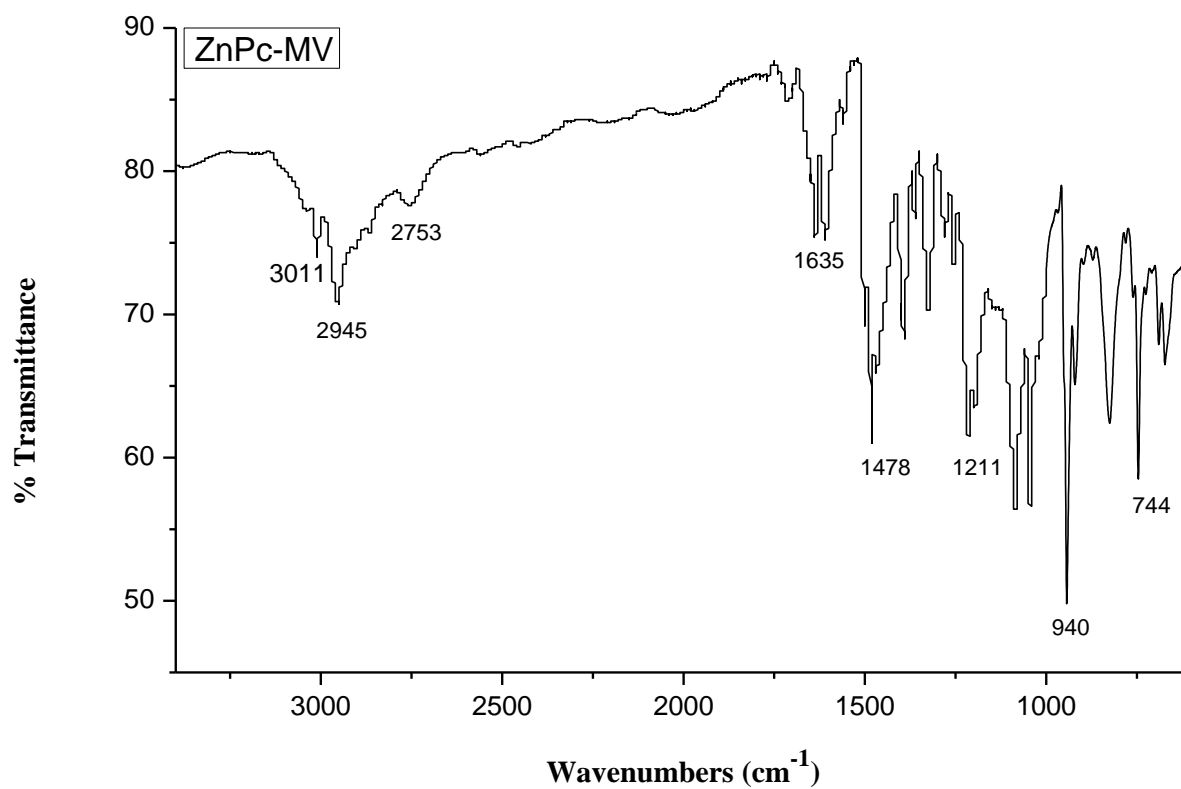

**Fig. S9.** FT-IR spectrum of ZnPc-MV.

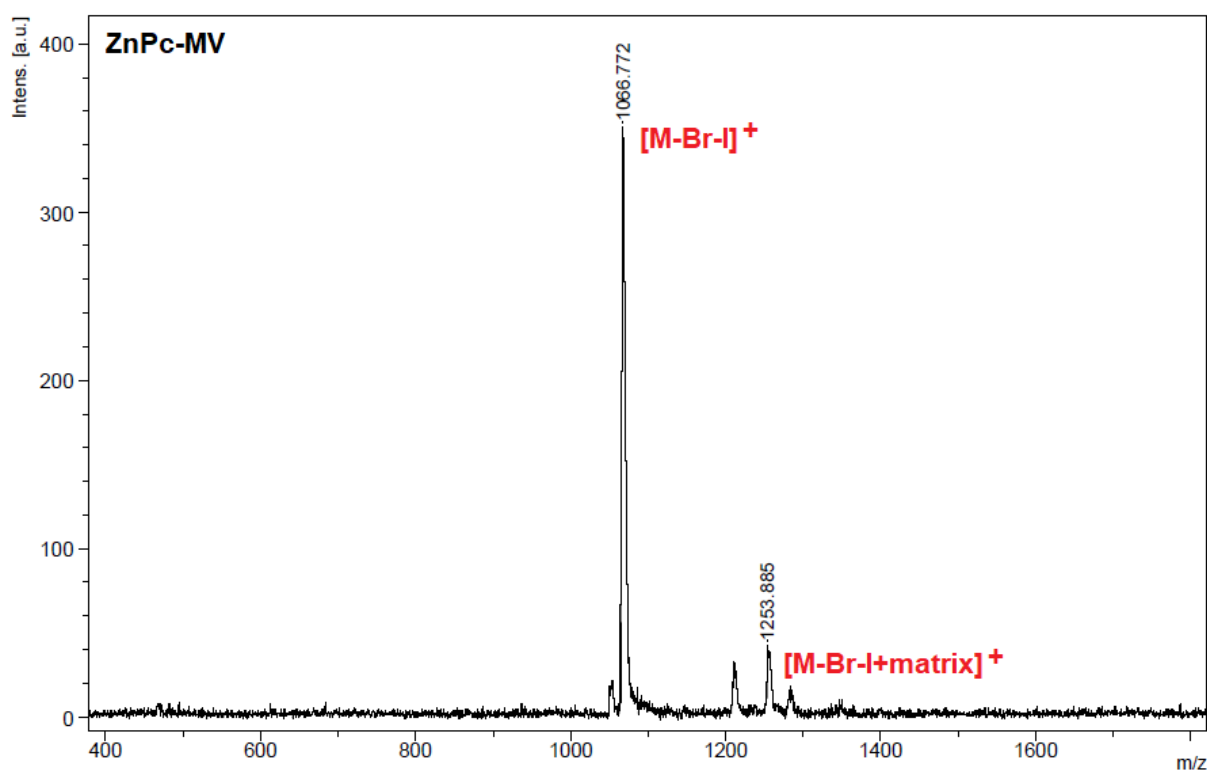

**Fig. S10.** MALDI-TOF MS spectrum of ZnPc-MV (matrix:  $\alpha$ -cyano-4-hydroxy-cinnamic acid).

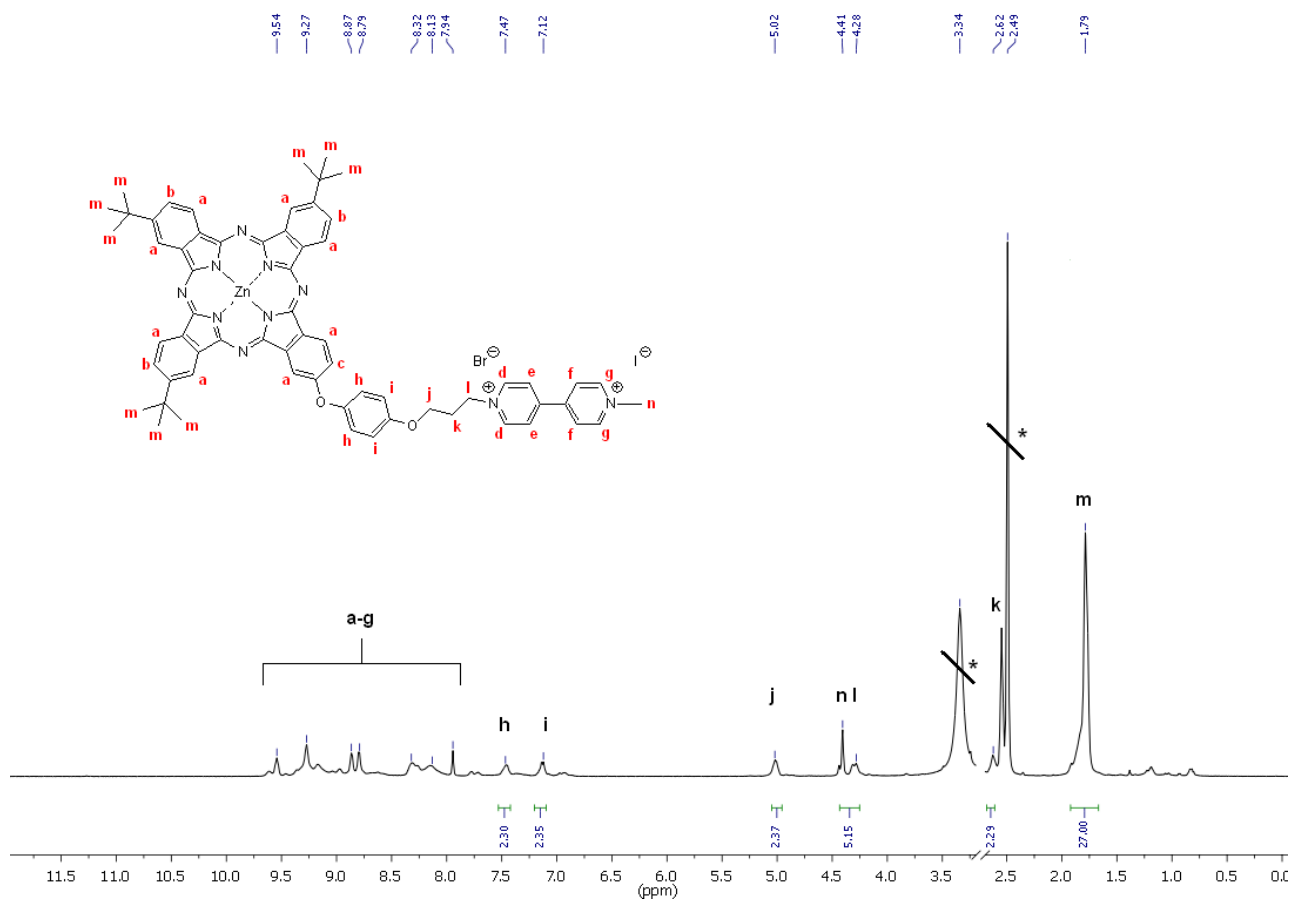

**Fig. S11.**  $^1\text{H-NMR}$  spectrum of **ZnPc-MV** in  $\text{DMSO-}d_6$  (\* indicates residual solvent peaks).

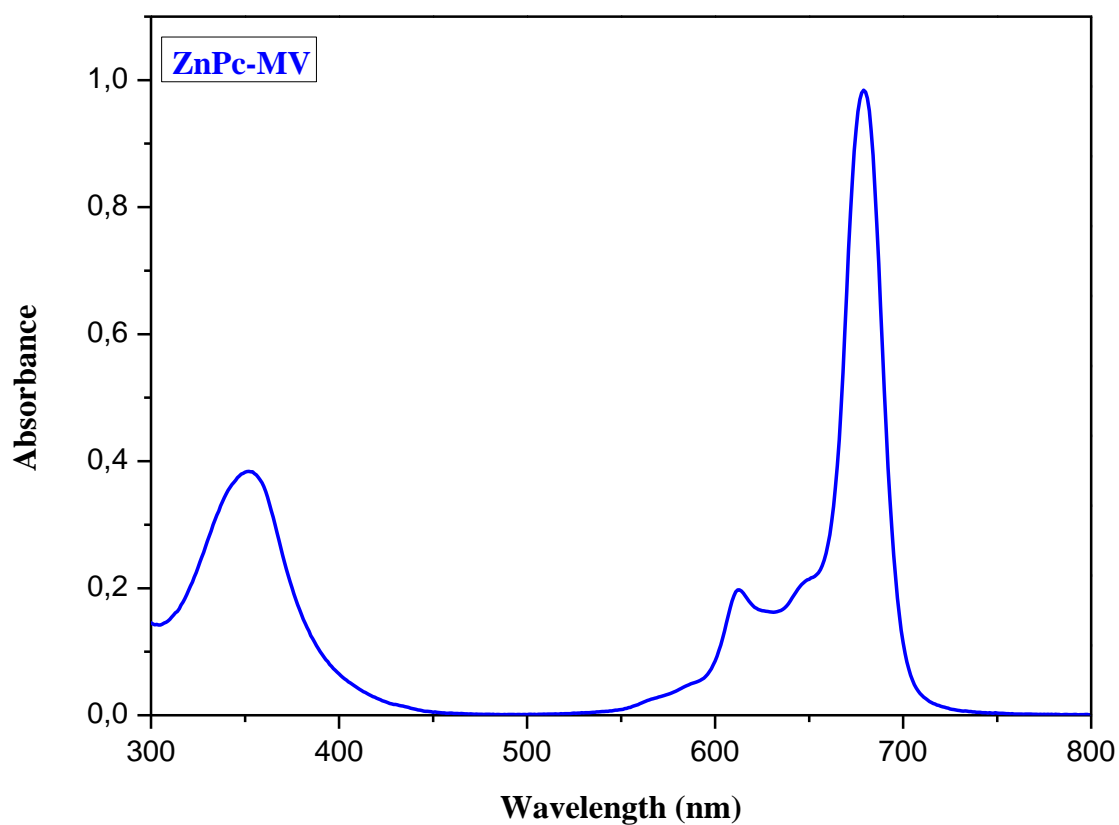

**Fig. S12.** UV-vis spectrum of **ZnPc-MV** in  $\text{DMSO}$  (concentration:  $10^{-5}$  M).
